# Supplementary material for: What Will Be the Impact of the COVID-19 Quarantine on Psychological Distress? Considerations Based on a Systematic Review of Pandemic Outbreaks
Source: MDPI journal article supplement (doi:10.3390/healthcare9010101), 2021-01-19
Supplement: s1 [file s1]

**Table S1.** Overview of the selected studies.

| Study                       | Sample description                                                           | Country   | Disease          | Study design                                                  | Quarantine length | Assessment tools                                                   | Outcome measure                            | % of clinical distress                                        | Other significant findings                                                                                                                                                                                                                                  | Note                                                                                                   |
|-----------------------------|------------------------------------------------------------------------------|-----------|------------------|---------------------------------------------------------------|-------------------|--------------------------------------------------------------------|--------------------------------------------|---------------------------------------------------------------|-------------------------------------------------------------------------------------------------------------------------------------------------------------------------------------------------------------------------------------------------------------|--------------------------------------------------------------------------------------------------------|
| Hawryluck et al., 2004 [15] | <i>N</i> = 129<br>Gender distribution non reported                           | Canada    | SARS             | Cross-sectional<br>General population survey                  | Median 10 days    | IES-R<br>(cut-off $\geq 20$ )<br><br>CES-D<br>(cut-off $\geq 16$ ) | PTSD symptoms<br><br>Depressive symptoms   | Overall 30.05%<br><br>PTSD 28.9%<br><br>Depression 31.2%      | The duration of quarantine was significantly related to increased PTSD and depressive symptoms                                                                                                                                                              | Responders completed the survey at the end of quarantine and within the pandemic                       |
| Reynolds et al., 2008 [16]  | <i>N</i> =1057<br>(37% M; mean age 49.2)                                     | Canada    | SARS             | Cross-section<br>General population survey                    | 8 days            | IES-R<br>(cut-off $\geq 20$ )                                      | PTSD symptoms                              | PTSD 14.6%                                                    | Health-care workers experienced more severe symptoms of PTSD ( $p < .001$ )                                                                                                                                                                                 | Responders completed the survey during quarantine and within the pandemic                              |
| Taylor et al., 2008 [17]    | <i>N</i> =2760<br>(15% M; mean age not reported)                             | Australia | Equine influenza | Cross-sectional<br>Retrospective<br>General population survey | Not reported      | K10<br>(cut-off $\geq 30$ )                                        | Anxiety and Depression                     | Anxiety and depression 14%                                    | Individuals who lived in a high-risk infection (red) zone were at much greater risk of high psychological distress.<br>Younger people, and those with lower levels of formal educational qualifications were at greater risk of high psychological distress | Responders were quarantined during the pandemic                                                        |
| Wang et al., 2011 [18]      | <i>N</i> = 419<br>Quarantined <i>N</i> =176<br>Nonquarantined <i>N</i> = 243 | China     | H1N1             | Cross-sectional<br>case-control studies                       | 7 days            | IES-R<br>(cut-off $\geq 20$ )<br><br>SRQ-20<br>(cut-off $\geq 7$ ) | PTSD symptoms<br><br>General mental health | Overall 12.9%<br>Overall PTSD 14.3%<br>PTSD Quarantined 10.8% | No significant differences for positive screening measures between quarantined and nonquarantined students                                                                                                                                                  | The survey was completed for all participants at the end of the quarantine period during the pandemic. |

|                               |                                                                 |       |      |                                                                          |                   |                                                                                          |                               |                                                           |                                                                                                                                                                                                                                                                                                                                       |                                                                                                                              |  |
|-------------------------------|-----------------------------------------------------------------|-------|------|--------------------------------------------------------------------------|-------------------|------------------------------------------------------------------------------------------|-------------------------------|-----------------------------------------------------------|---------------------------------------------------------------------------------------------------------------------------------------------------------------------------------------------------------------------------------------------------------------------------------------------------------------------------------------|------------------------------------------------------------------------------------------------------------------------------|--|
|                               |                                                                 |       |      |                                                                          |                   |                                                                                          |                               |                                                           | PTSD<br>Not quaran-<br>tined<br>16.87%                                                                                                                                                                                                                                                                                                |                                                                                                                              |  |
|                               |                                                                 |       |      |                                                                          |                   |                                                                                          |                               |                                                           | Overall gen-<br>eral mental<br>health<br>11.45%                                                                                                                                                                                                                                                                                       |                                                                                                                              |  |
|                               |                                                                 |       |      |                                                                          |                   |                                                                                          |                               |                                                           | General men-<br>tal health<br>quarantined<br>7.95%                                                                                                                                                                                                                                                                                    |                                                                                                                              |  |
|                               |                                                                 |       |      |                                                                          |                   |                                                                                          |                               |                                                           | General men-<br>tal health<br>Not quaran-<br>tined<br>14%                                                                                                                                                                                                                                                                             |                                                                                                                              |  |
| Sprang & Silman, 2013<br>[19] | N= 398<br>(22% M; mean age<br>= 37)                             | USA   | H1N1 | Cross-sectional<br>Retrospective<br>General popu-<br>lation survey       | Not re-<br>ported | PCL-C<br>parent<br>(cut-off ≥ 25)<br><br>PTSD-RI<br>Child<br>(cut-off not re-<br>ported) | PTSD symptoms                 | PTSD<br>25%                                               | 5.8% of parents<br>scored above 30 on<br>the PCL-C, indicat-<br>ing that the diag-<br>nostic threshold for<br>PTSD was met.<br>Children who ex-<br>perienced isolation<br>or quarantine were<br>more likely to meet<br>the clinical cutoff<br>score for PTSD<br>(30%) than those<br>who had not been<br>in isolation or<br>quarantine | Responders were<br>quarantined during<br>the pandemic                                                                        |  |
| Jeong et al., 2016<br>[20]    | N=1692;<br><br>N = 36 MERS cases<br>(50% M; mean age<br>= 52.3) | Korea | MERS | Case-control<br>(MERS cases<br>vs isolated)<br>Isolated people<br>survey | 21 days           | STAXI<br>(cut-off ≥ 14)<br><br>GAD-7<br>(cut-off ≥ 10)                                   | Anger<br><br>Anxiety symptoms | Overall<br>9.02<br><br>Anger during<br>isolation<br>17.4% | Patients with<br>MERS had signifi-<br>cant high rates of<br>clinical anger and<br>anxious during the<br>isolation period:                                                                                                                                                                                                             | Responders were as-<br>sessed during the<br>isolation period<br>and four to six<br>months after re-<br>moval from isolation. |  |

|                          |                                             |              |       |                                                             |         |                                                                            |                                                      |                                                  |                                                                                                                    |                                                                |  |  |  |  |
|--------------------------|---------------------------------------------|--------------|-------|-------------------------------------------------------------|---------|----------------------------------------------------------------------------|------------------------------------------------------|--------------------------------------------------|--------------------------------------------------------------------------------------------------------------------|----------------------------------------------------------------|--|--|--|--|
|                          |                                             |              |       | <i>N</i> = 1656 isolated people<br>(43% M; mean age = 43.9) |         |                                                                            |                                                      |                                                  | Anger after isolation<br>6.9%                                                                                      | MERS <sub>anger</sub> =<br>52.8% (95% CI:<br>36.5 - 69.1%)     |  |  |  |  |
|                          |                                             |              |       |                                                             |         |                                                                            |                                                      |                                                  | Anxiety during isolation<br>8.4%                                                                                   | Isolated <sub>anger</sub> =<br>16.6% (95% CI:<br>14.8 -18.4%)  |  |  |  |  |
|                          |                                             |              |       |                                                             |         |                                                                            |                                                      |                                                  | Anxiety after isolation<br>3.4%                                                                                    | MERS <sub>anxiety</sub> =<br>47.2% (95% CI:<br>30.9 - 63.5%)   |  |  |  |  |
|                          |                                             |              |       |                                                             |         |                                                                            |                                                      |                                                  |                                                                                                                    | Isolated <sub>anxiety</sub> =<br>7.6% (95% CI: 6.3 - 8.9%)     |  |  |  |  |
|                          |                                             |              |       |                                                             |         |                                                                            |                                                      |                                                  |                                                                                                                    | These differences were replicated after removal from isolation |  |  |  |  |
|                          |                                             |              |       |                                                             |         |                                                                            |                                                      |                                                  |                                                                                                                    | MERS <sub>anger</sub> =<br>30.6% (95% CI:<br>15.6 - 45.7%)     |  |  |  |  |
|                          |                                             |              |       |                                                             |         |                                                                            |                                                      |                                                  |                                                                                                                    | Isolated <sub>anger</sub> =<br>6.4% (95% CI: 5.2 - 7.6%)       |  |  |  |  |
|                          |                                             |              |       |                                                             |         |                                                                            |                                                      |                                                  |                                                                                                                    | MERS <sub>anxiety</sub> =<br>19.4% (95% CI:<br>6.5 - 32.3%)    |  |  |  |  |
|                          |                                             |              |       |                                                             |         |                                                                            |                                                      |                                                  |                                                                                                                    | Isolated <sub>anxiety</sub> =<br>3.0% (95% CI: 2.2 - 3.9%)     |  |  |  |  |
| Jalloh et al., 2018 [21] | <i>N</i> = 3564<br>(50% M; median age = 35) | Sierra Leone | Ebola | Cross-sectional Retrospective General population survey     | 21 days | IES-6<br>(cut-off ≥ 1.09 mean item equivalent to 24 on IES-R)<br><br>PHQ-4 | PTSD symptoms<br><br>Depressive and anxious symptoms | Overall 11%<br><br>PTSD 16%<br><br>Depression 6% | Those participants who knew someone quarantined due to Ebola exposure alone were more likely to report symptoms of | Responders were not directly quarantined                       |  |  |  |  |

|                       |                                                                           |       |      |                                                                                                                        |              |                                                                                                                          |                                                                  |                                                                                                  |                                                                                                                                                                      |                                                                                                                                                                                                                                                                                         |
|-----------------------|---------------------------------------------------------------------------|-------|------|------------------------------------------------------------------------------------------------------------------------|--------------|--------------------------------------------------------------------------------------------------------------------------|------------------------------------------------------------------|--------------------------------------------------------------------------------------------------|----------------------------------------------------------------------------------------------------------------------------------------------------------------------|-----------------------------------------------------------------------------------------------------------------------------------------------------------------------------------------------------------------------------------------------------------------------------------------|
|                       |                                                                           |       |      |                                                                                                                        |              | (cut-off $\geq 6$ )                                                                                                      |                                                                  |                                                                                                  |                                                                                                                                                                      | anxiety and depression (OR = 2.3; 95%CI: 1.7-2.9, $p < .001$ ) and PTSD (OR = 2.0; 95%CI: 1.5 - 2.8, $p < .001$ )                                                                                                                                                                       |
|                       |                                                                           |       |      |                                                                                                                        |              |                                                                                                                          |                                                                  |                                                                                                  |                                                                                                                                                                      | Respondents who had both experiences (that is, they knew at least one person who died from Ebola and someone quarantined) were also more likely to report symptoms of anxiety and depression (OR = 1.8; 95%CI: 1.5 - 2.2, $p < .001$ ) and PTSD (OR = 2.3 95%CI 1.8 – 2.8; $p < .001$ ) |
| Kim et al., 2018 [22] | $N= 27$<br>(37% M; mean age = 41.15)                                      | Korea | MERS | Cross-sectional<br><br>Assessment of hospitalized individuals with confirmed ( $N= 18$ ) and suspected ( $N= 9$ ) MERS | Not reported | IES-R<br>(cut-off not reported)<br><br>KNHANES-short form<br>(cut-off not reported)<br><br>PHQ-9<br>(cut-off $\geq 10$ ) | PTSD symptoms<br><br>Levels of stress<br><br>Depressive symptoms | PTSD<br>Not reported<br><br>Levels of stress<br>Not reported<br><br>Depressive symptoms<br>40.7% | Confirmed Mers:17 (70.8%) exhibited psychiatric symptoms and 10 (41.7%) received a psychiatric diagnosis.<br><br>Suspected MERS did not exhibit psychiatric symptoms | Participants were assessed during MERS pandemic (3 months) and therapeutic isolation                                                                                                                                                                                                    |
| Lee et al., 2018 [23] | $N= 432$<br>$N= 359$ hospital workers<br>(18.1% M; mean age not reported) | Korea | SARS | Cross-sectional<br>Hospital workers survey and clinical assessment procedures of patients with SARS                    | Not reported | IES-R<br>Hospital workers<br>(cut-off $\geq 25$ )<br><br>MINI<br>Inpatients Depression                                   | PTSD symptoms<br><br>Depressive symptoms<br><br>Anxiety symptoms | Overall<br>25.6%<br><br>PTSD<br>Hospital workers<br>51.5%                                        | The healthcare workers who performed MERS-related tasks had significantly higher total IES-R scores ( $t = 3.89$ , $p < .001$ )                                      | The initial sample of hospital workers were not quarantined. A second survey assessed PTSD symptoms among hospital workers (N=77; quarantined)                                                                                                                                          |

|                       |                                                                             |       |          |                     |         |                                                                                                                          |                                               |                                                                                 |                                                                                                                                                                                                                                                                                                                                                                                                                                                                                                                                                                                                                                       |                                                                                                                                                                                                               |
|-----------------------|-----------------------------------------------------------------------------|-------|----------|---------------------|---------|--------------------------------------------------------------------------------------------------------------------------|-----------------------------------------------|---------------------------------------------------------------------------------|---------------------------------------------------------------------------------------------------------------------------------------------------------------------------------------------------------------------------------------------------------------------------------------------------------------------------------------------------------------------------------------------------------------------------------------------------------------------------------------------------------------------------------------------------------------------------------------------------------------------------------------|---------------------------------------------------------------------------------------------------------------------------------------------------------------------------------------------------------------|
|                       | N=73 hemodialysis patients<br>(56.2% M; mean age = 61.3 (Sars, South Korea) |       |          |                     |         | (cut-off ≥ 5)<br>Anxiety<br>(cut-off ≥ 3)<br><br>HADS Inpatients Depression<br>(cut-off ≥ 8)<br>Anxiety<br>(cut-off ≥ 8) |                                               | Depressive symptoms in- patients 10.3%<br><br>Anxiety symptoms in- patients 11% | and sub-scores, in- cluding hyper-arousal ( $t = 3.535$ , $p < .001$ ), avoid- ance ( $t = 3.573$ , $p < .001$ ), intrusion ( $t = 3.756$ , $p < .001$ ), and sleep and numb- ness ( $t = 3.583$ , $p < .001$ )                                                                                                                                                                                                                                                                                                                                                                                                                       | $N = 23$ ; not quaran- tined $N = 54$ ). How- ever, the study did not report the % of sample which ex- ceeded the IES-R cut-off score                                                                         |
| Lei et al., 2020 [24] | N=1593<br>(38.7% M)                                                         | China | COVID-19 | Cross-section study | 30 days | SAS<br>(cut-off ≥ 50)<br><br>SDS<br>(cut-off ≥ .50)                                                                      | Depressive symp- toms<br><br>Anxiety symptoms | Depression 7.3%<br><br>Anxiety 4.5%                                             | Anxiety in affected was predicted by average household income ( $p = 0.028$ ), self-per- ceived health con- dition ( $p < 0.001$ ), property damage ( $p = 0.003$ ); in unaf- fected group by di- vorced/widowed ( $p = 0.001$ ), self-eval- uated level of knowledge ( $p = 0.032$ ) and self- perceived health ( $p = 0.001$ ).<br>Depression in af- fected group pre- dicted by education level ( $p = 0.015$ ), self-perceived health condition ( $p < 0.001$ ), property damage ( $p = 0.002$ ); in unaf- fected group by di- vorced/widowed ( $p < 0.001$ ), self-per- ceived health con- dition ( $p < 0.001$ ), being worried | The study assessed several psychosocial risk for the onset of psychiatric symp- toms linked to quar- antine.<br><br>No subgroup anal- yses were conducted considering different levels of exposure to illness |

|                      |                   |       |          |                                           |              |                                            |                       |                                   |                                                                                                                                                                                                                                                                                                                                                                                                                                                                                                                                                                                                                                                                                                                                                                                                                                                                                                                                                                          |
|----------------------|-------------------|-------|----------|-------------------------------------------|--------------|--------------------------------------------|-----------------------|-----------------------------------|--------------------------------------------------------------------------------------------------------------------------------------------------------------------------------------------------------------------------------------------------------------------------------------------------------------------------------------------------------------------------------------------------------------------------------------------------------------------------------------------------------------------------------------------------------------------------------------------------------------------------------------------------------------------------------------------------------------------------------------------------------------------------------------------------------------------------------------------------------------------------------------------------------------------------------------------------------------------------|
|                      |                   |       |          |                                           |              |                                            |                       |                                   | about being infected (p = 0.006) and presence of psychological support (p = 0.043).                                                                                                                                                                                                                                                                                                                                                                                                                                                                                                                                                                                                                                                                                                                                                                                                                                                                                      |
| Li et al., 2020 [25] | N= 5033 (33.3% M) | China | COVID-19 | Cross-sectional General population survey | Not reported | GAD-7 (cut-off ≥ 8)<br>PHQ-9 (cut-off ≥ 8) | Anxiety<br>Depression | Anxiety 20.4%<br>Depression 20.4% | <p>Anxiety and/or depression was significantly associated with time spent on COVID-19-related news per day (p&lt;0.001). Anxiety was associated with psychological stressors such as “I worry about myself and my loved ones being infected by COVID-19” (OR=1.95, 95% CI: 1.54-2.49), “I worry about my income, job, study or ability to pay the loan being affected” (OR=1.38, 95% CI: 1.13-1.68), and “Home quarantine causes great inconvenience to my daily life” (OR=1.31, 95% CI: 1.04-1.64). The same psychological stressors were associated with depression (respectively OR=1.24, 95% CI: 1.04-1.50; OR=1.58, 95% CI: 1.35-1.86; OR=1.42, 95% CI: 1.18- 1.70)</p> <p>The study evaluated different content of anxiety and depression symptoms linked to consequences of specific stressors. The absence of longitudinal data did not allow the investigators to assess the temporal stability of risk factors for the development of psychiatric symptoms</p> |

|                            |                                      |       |          |                                              |         |                                                                                                                                                  |                                                                    |                                                                    |                                                                                                                                                                                                                                                                                                                                                                                                                                                                                                                                                                                                                               |                                                                                                                                                                                                                      |
|----------------------------|--------------------------------------|-------|----------|----------------------------------------------|---------|--------------------------------------------------------------------------------------------------------------------------------------------------|--------------------------------------------------------------------|--------------------------------------------------------------------|-------------------------------------------------------------------------------------------------------------------------------------------------------------------------------------------------------------------------------------------------------------------------------------------------------------------------------------------------------------------------------------------------------------------------------------------------------------------------------------------------------------------------------------------------------------------------------------------------------------------------------|----------------------------------------------------------------------------------------------------------------------------------------------------------------------------------------------------------------------|
| Liu et al., 2020<br>[26]   | N = 217 (41.5% M;<br>mean age 21.7)  | China | COVID-19 | Cross-sectional<br>student population survey | 30 days | GAD-7<br>(cut-off $\geq 8$ )<br><br>PHQ-9<br>(cut-off $\geq 8$ )                                                                                 | Depression<br><br>Anxiety                                          | Depression<br>35.5%<br><br>Anxiety<br>22.1%                        | Prevalence of depression and anxiety were not significantly different in students according to gender ( $p = 0.155$ ), Geographical location ( $p = 0.356$ ) and grade ( $p = 0.097$ ).                                                                                                                                                                                                                                                                                                                                                                                                                                       | The study assessed a high risk population for developing psychiatric conditions as a consequence of quarantine. The number of participants of study was too small to generalize results to other student populations |
| Mazza et al., 2020<br>[27] | N= 2766<br>(28.3% M; mean age 32.94) | Italy | COVID-19 | Cross-sectional<br>General population survey | 14 days | DASS-21<br>depression<br>(cut-off $\geq 21$ )<br><br>DASS-21<br>anxiety<br>(cut-off $\geq 15$ )<br><br>DASS-21<br>stress<br>(cut-off $\geq 27$ ) | Depression symptoms<br><br>Anxiety symptoms<br><br>Stress symptoms | Depression<br>32.8%<br><br>Anxiety<br>19.0%<br><br>Stress<br>29.2% | Stress was associated with female gender ( $p < 0.001$ ), negative affect, ( $p < 0.001$ ), detachment ( $p < 0.001$ ), acquaintance infected ( $p < 0.001$ ). Depression with female gender ( $p < 0.001$ ), negative affect ( $p < 0.001$ ), detachment ( $p < 0.001$ ), having an acquaintance infected ( $p < 0.001$ ) history of stressful situations ( $p = 0.008$ ), medical problems ( $p = .047$ ). Anxiety was associated with female gender ( $p < 0.001$ ), negative affect ( $p < 0.001$ ), detachment ( $p < 0.001$ ), history of stressful situations ( $p = 0.008$ ), medical problems ( $p = 0.001$ ), and a | This longitudinal study evaluated the impact of personality as a relevant risk factor for the onset of psychiatric symptoms. The study also included the assessment of different levels of exposure to illness       |





|                                     |                            |       |          |                                           |              |                                 |                                                                  |                                                   |                                                                                                                                                                                                                                                                    |                                                                                                                                                                                                                                                           |
|-------------------------------------|----------------------------|-------|----------|-------------------------------------------|--------------|---------------------------------|------------------------------------------------------------------|---------------------------------------------------|--------------------------------------------------------------------------------------------------------------------------------------------------------------------------------------------------------------------------------------------------------------------|-----------------------------------------------------------------------------------------------------------------------------------------------------------------------------------------------------------------------------------------------------------|
| Ozamiz-Etxebarria et al., 2020 [30] | <i>N</i> = 976 (18.9% M)   | Spain | COVID-19 | Cross-sectional General population survey | Not reported | DASS-21 (cut-off: not reported) | Depression/Anxiety Stress                                        | Depression 22.0%<br>Anxiety 28.8%<br>Stress 22.0% | Younger individuals with chronic diseases reported more symptoms than the rest of the population. The study also detected higher levels of symptoms after the stay-at-home order was issued. Such symptoms are predicted to increase as the confinement continues. | The study did not consider psychosocial risk factors that were involved in explaining severity of psychiatric symptoms. The study recruited participant from a specific region of Spain                                                                   |
| Qiu et al., 2020 [31]               | <i>N</i> = 52730 (35.2% M) | China | COVID-19 | Cross-section General population survey   | 21 days      | CPDI (cut-off $\geq 52$ )       | Anxiety and depression symptoms, together with related behaviors | Anxiety and Depression 35%                        | Female respondents showed significantly higher psychological distress than their male counterparts ( $p < .001$ ). Individuals between 18 and 30 years of age or above 60 presented the highest CPDI scores                                                        | Responders completed the survey during the quarantine                                                                                                                                                                                                     |
| Somma et al., 2020 [32]             | <i>N</i> = 1043 (18.5% M)  | Italy | COVID-19 | Cross-section General population survey   | 10 days      | SDQ EPS (cut-off $\geq 7$ )     | Emotional and behavioral problems                                | Overall 13.2%                                     | Negative affectivity ( $t(1041) = 19.02$ , Cohen's $d = 1.18$ ) and detachment ( $t(1041) = 13.32$ , Cohen's $d = 0.83$ ) represented relevant risk factors for reduced emotional well-being                                                                       | The study showed that maladaptive personality traits were involved in explaining the onset of psychological distress during quarantine. The characteristics of the sample did not allow the investigators to generalize results to the Italian population |

|                            |                      |         |          |                                               |         |                                                                    |                                          |                                        |                                                                                                                                                                                                                                                                                                                                                                                                    |                                                                                                                                                                                                                                                                                   |
|----------------------------|----------------------|---------|----------|-----------------------------------------------|---------|--------------------------------------------------------------------|------------------------------------------|----------------------------------------|----------------------------------------------------------------------------------------------------------------------------------------------------------------------------------------------------------------------------------------------------------------------------------------------------------------------------------------------------------------------------------------------------|-----------------------------------------------------------------------------------------------------------------------------------------------------------------------------------------------------------------------------------------------------------------------------------|
| Tang et al., 2020<br>[33]  | N=2485 (39.2% M)     | China   | COVID-19 | Cross-sectional<br>Students population survey | 30 days | PCL-C<br>(cut-off $\geq 38$ )<br><br>PHQ-9<br>(cut-off $\geq 10$ ) | PTSD symptoms<br><br>Depressive symptoms | PTSD<br>2.7%<br><br>Depression<br>9.0% | Feeling extreme fear was the most significant predictor for both depression ( $p < 0.001$ ) and PTSD ( $p < 0.001$ ), followed by short sleep duration ( $p < 0.001$ ), living in the worst-hit areas ( $p < 0.001$ ); Sleep duration was observed to be a mediator between number of exposures and PTSD ( $z = 0.104$ , 95% CI: 0.016, 0.204), or depression ( $z = .065$ , 95% CI: 0.010, 0.126) | The study showed a key role of neurovegetative alterations on the development of psychiatric symptoms during quarantine. The study recruited a sample composed of students. Therefore, this characteristics of sample did not allow the investigators to generalize the results   |
| Fawaz et al., 2020<br>[34] | N = 950<br>(69.3% M) | Lebanon | COVID-19 | Longitudinal<br>survey on general population  | 30 days | PCL-C<br>(cut-off $\geq 3$ )                                       | PTSD symptoms                            | 37.72%                                 | No difference in the prevalence of PTSD symptoms among genders ( $p = .07$ ), among occupations (health care worker or not, $p = .34$ ), age ( $p = .15$ ) and leaving home during quarantine or not ( $p = .77$ ), but the possible sources of exposure to COVID-19 ( $p = .02$ ). Gender, age, occupation, potential sources of exposure and leaving home or not were not predictors of PTSD.    | This study was carried out a pre-post test research design. Furthermore, the investigators included the evaluation of different levels of exposure to illness. However, the study did not consider relevant psychosocial risk factors for the development of psychiatric symptoms |

|                              |                                         |       |          |                                                   |                                                                   |                       |              |                                                                                                                                                                                                                                                                                                                                                                                                                                                                                                                                                                                                                                                                                                                                                                                                                                                                                  |                                                                                                                                                                                                                                                                  |
|------------------------------|-----------------------------------------|-------|----------|---------------------------------------------------|-------------------------------------------------------------------|-----------------------|--------------|----------------------------------------------------------------------------------------------------------------------------------------------------------------------------------------------------------------------------------------------------------------------------------------------------------------------------------------------------------------------------------------------------------------------------------------------------------------------------------------------------------------------------------------------------------------------------------------------------------------------------------------------------------------------------------------------------------------------------------------------------------------------------------------------------------------------------------------------------------------------------------|------------------------------------------------------------------------------------------------------------------------------------------------------------------------------------------------------------------------------------------------------------------|
| Germani et al., 2020<br>[35] | N= 1011 emerging<br>adults<br>(28.7% M) | Italy | COVID-19 | Cross-sectional<br>General popu-<br>lation survey | STAI-Y<br>(cut-off $\geq 40$ )<br><br>PSS<br>(cut-off $\geq 14$ ) | Anxiety<br><br>Stress | Not reported | State anxiety<br>(STAI-Y, mean $\pm$<br>SD: $48.56 \pm 12.73$ )<br>and stress levels<br>(PSS, mean $\pm$ SD:<br>$21.59 \pm 7.16$ ) were<br>above the normal<br>cut-off. Collec-<br>tivist orientation<br>was related to<br>higher perceived<br>risks of infection<br>(horizontal collec-<br>tivism with general<br>concern: coeff =<br>0.18; with personal<br>concern: coeff =<br>0.12; with rela-<br>tives/others con-<br>cern: coeff = 0.13,<br>all $p < 0.001$ ; verti-<br>cal collectivism<br>with general con-<br>cern: coeff = 0.20;<br>with personal con-<br>cern: coeff = 0.23;<br>with relatives/others<br>concern: coeff<br>= 0.18, all<br>$p < 0.001$ ) and pre-<br>dicted lower psy-<br>chological malad-<br>justment, control-<br>ling for socio-de-<br>mographic varia-<br>bles (horizontal<br>collectivism: B = -<br>0.24, -0.3 - -0.18<br>95% CI, $p < 0.001$ ). | The study assessed<br>the role of cultural<br>and several psycho-<br>social factors on the<br>severity of psychiat-<br>ric symptoms during<br>quarantine.<br>The convenience<br>sampling method did<br>not allow the investi-<br>gators to generalize<br>results |
|------------------------------|-----------------------------------------|-------|----------|---------------------------------------------------|-------------------------------------------------------------------|-----------------------|--------------|----------------------------------------------------------------------------------------------------------------------------------------------------------------------------------------------------------------------------------------------------------------------------------------------------------------------------------------------------------------------------------------------------------------------------------------------------------------------------------------------------------------------------------------------------------------------------------------------------------------------------------------------------------------------------------------------------------------------------------------------------------------------------------------------------------------------------------------------------------------------------------|------------------------------------------------------------------------------------------------------------------------------------------------------------------------------------------------------------------------------------------------------------------|

CES-D = Center for Epidemiologic Studies—Depression Scale; CPD = COVID-19 Peritraumatic Distress Index; GAD-7= Generalized Anxiety Disorder Scale; HADS = Hospital Anxiety and Depression Scale; IES-6: Impact of Event Scale-6; IES-R: Impact of Event Scale-Revised; K-10 = Kessler 10; KANES: Korean National Health and Nutrition Examination Survey; M= Men; MERS: Middle East Respiratory Syndrome; MINI = Mini International Neuropsychiatric Interview; PCL-C = PTSD Check List - Civilian Version; PHQ-4,9 = Patient Health Questionnaire-4,9; PSS: Perceived Stress Scale; PTSD= post-traumatic stress disorder; PTSD-RI = PTSD Check List - Civilian Version; SDQ-EPS = Strengths and Difficulties Questionnaire Emotional Problems scale; SRQ-20 = Self-Report Questionnaire STAXI = State-Trait Anger Expression Inventory.
